**Xavier Capdevila, M.D., Ph.D.**  
Associate Professor of Anesthesiology  
Lapeyronie University Hospital  
371, Av du Doyen  
Gaston Giraud Montpellier Cedex 5  
Paris 34295, France

## References

1. Capdevila X, Calvet Y, Biboulet PH, Biron C, Rubenovitch J, d'Athis F: Aprotinin decreases blood loss and homologous transfusions in patients undergoing major orthopedic surgery. *ANESTHESIOLOGY* 1998; 88:50-7
2. Royston D: High-dose aprotinin therapy: A review of the first five years' experience. *J Cardiothorac Vasc Anesth* 1992; 6:76-100
3. Hardy JF, Desroches J: Natural and synthetic antifibrinolytics in cardiac surgery. *Can J Anaesth* 1992; 39:353-65
4. Murphy WG, Davies MJ, Eduardo A: The haemostatic response to surgery and trauma. *Br J Anaesth* 1993; 70:205-13
5. Harke H, Rahman S: Haemostatic disorders in massive transfusion. *Bibl Haematol* 1980; 46:179-88
6. Chabbat J, Porte P, Tellier M, Steinbuch M: Aprotinin is a competitive inhibitor of the factor VIIa-tissue factor complex. *Thromb Res* 1993; 71:205-15
7. Segal HC, Hunt BJ, Cottam S, Downing A, Beard C, Francis JL, Potter D, Tan KC: Fibrinolytic activity during orthotopic liver transplantation with and without aprotinin. *Transplantation* 1994; 58:1356-60
8. Lentschener C, Benhamou D, Mercier F, Boyer-Neumann C, Smadja C, Wolf M, Franco D: Aprotinin reduces blood loss in elective liver resection. *Anesth Analg* 1997; 84:875-81
9. Laurel MT, Ratnoff OD, Everson B: Inhibition of the activation of Hageman factor (factor XII) by aprotinin (Trasylo). *J Lab Clin Med* 1992; 119:580-5
10. Hunt BJ, Cottam S, Segal H, Ginsburg R, Potter D: Inhibition by aprotinin of tPA-mediated fibrinolysis during orthotopic liver transplantation (letter). *Lancet* 1990; 336(8711):381
11. Espana F, Estelles A, Griffin JH, Aznar J, Gilabert J: Aprotinin (trasylo) is a competitive inhibitor of activated protein C. *Thromb Res* 1989; 56:751-6
12. Tatar H, Cicek S, Demirkilic U, Ozal E, Suer H, Ozturk O, Isiklar H: Topical use of aprotinin in open heart operations. *Ann Thorac Surg* 1993; 55:659-61
13. O'Regan DJ, Giannopoulos N, Mediratta N, Kendall SW, Forni A, Pilai R, Westaby S: Topical aprotinin in cardiac operations. *Ann Thorac Surg* 1995; 60:1155
14. Janssens M, Joris J, Davis JL, Lemaire R, Lamy M: High-dose aprotinin reduces blood loss in patients undergoing total hip replacement surgery. *ANESTHESIOLOGY* 1994; 80:23-9
15. Wachtfogel YT, Harpel PC, Edmunds LH Jr, Colman RW: Formation of C1s-inhibitor, kallikrein-C&-inhibitor and plasma-alpha2-plamins-inhibitor complexes during cardiopulmonary bypass. *Blood* 1989; 73:468-71

(Accepted for publication July 20, 1998.)

Anesthesiology  
1998; 89:1600  
© 1998 American Society of Anesthesiologists, Inc.  
Lippincott Williams & Wilkins

## Perfuse or Precondition?

*To the Editor:*—We read with interest the case report about coronary revascularization without cardiopulmonary bypass. In the article, the authors discuss ischemic preconditioning to prepare the myocardium for a 5- to 15-min period of coronary occlusion. The authors cite, "brief periods of occlusion have been shown to paradoxically protect or precondition the heart and to reduce the infarct size caused by a subsequent period of coronary artery occlusion."<sup>1</sup> The key point is that in undertaking an operation to protect or save myocardium, this procedure already acknowledges that one is going to kill some off—but only a little.

Our question is why precondition? Why not perfuse? In a case report published in another journal, we described the use of a perfusion cannula connected from the side port of a femoral artery DLP cannula.<sup>2</sup> The perfusion cannula is inserted into the coronary artery under direct visualization. This allows oxygenated arterial blood to perfuse the myocardium during the period of anastomosis. This is similar in function to a shunt used during a carotid endarterectomy. It is not necessary to use a femoral perfusion cannula to make this system work; many innovative sites, catheters, and tubing can be used. The key here is the concept of maintaining perfusion to the myocardium during the period of anastomosis to prevent infarction. Minimally invasive cardiac

surgery that avoids the use of cardiopulmonary bypass is an important new procedure that will only increase in popularity as new technologies and techniques continue to make it safer and more effective.

**Michael F. Borges, M.D.**  
Staff Anesthesiologist  
**Alan S. Coulson, M.D.**  
Director of Heart Institute  
Staff Cardiovascular and Vascular Surgeon  
Dameron Hospital  
Stockton, California  
dmrnborges@concentric.net

## References

1. Lawson CS: Preconditioning in man: Progress and prospects. *J Mol Cell Cardiol* 1995; 27:961-7
2. Borges MF, Spohn PK, Coulson AS: Arrhythmia/ischemia management during minimally invasive cardiac operation. *Ann Thorac Surg* 1997; 64:843-4

(Accepted for publication July 30, 1998.)
